# Supplementary material for: An underestimated photoactive area in organic solar cells based on a ZnO interlayer
Source: Royal Society of Chemistry journal article supplement (doi:10.1039/d1tc00745a), 2021-01-01
Supplement: d1tc00745a1.pdf [file d1tc00745a1.pdf]

## Supplementary information

### Underestimated photoactive area in organic solar cells based on a ZnO interlayer

*Zhi Chen<sup>a</sup>, Jie Wang<sup>a</sup>, Hui Jin<sup>a</sup>, Jianming Yang<sup>b</sup>, Qinye Bao<sup>b</sup>, Zaifei Ma<sup>a,\*</sup>, Wolfgang Tress<sup>c</sup> and Zheng Tang<sup>a,\*</sup>*

<sup>a</sup>State Key Laboratory for Modification of Chemical Fibers and Polymer Materials, Center for Advanced Low-dimension Materials, College of Materials Science and Engineering, Donghua University, Shanghai, 201620, P. R. China

<sup>b</sup>Key Laboratory of Polar Materials and Devices, School of Physics and Electronic Science, East China Normal University, 200241, Shanghai, P.R. China

<sup>c</sup>Institute of Computational Physics, Zurich University of Applied Sciences, Wildbachstr. 21, 8401 Winterthur, Switzerland

*Email: [ztang@dhu.edu.cn](mailto:ztang@dhu.edu.cn); [mazaifei@dhu.edu.cn](mailto:mazaifei@dhu.edu.cn)*

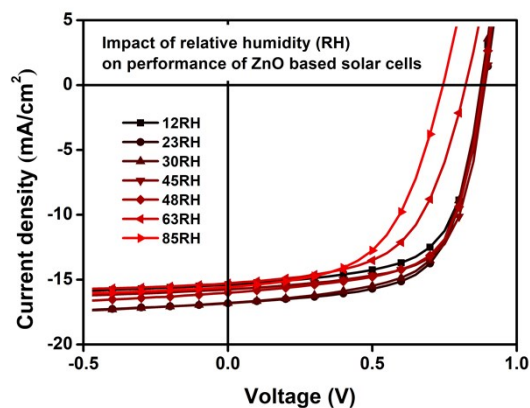

| Relative humidity (%) | $V_{OC}$ (V) | $J_{SC}$ (mA/cm <sup>2</sup> ) | FF (%) | PCE (%) |
|-----------------------|--------------|--------------------------------|--------|---------|
| 12                    | 0.879        | 15.38                          | 64.7   | 8.75    |
| 23                    | 0.889        | 16.82                          | 64.4   | 9.63    |
| 30                    | 0.876        | 16.80                          | 64.2   | 9.44    |
| 45                    | 0.890        | 15.76                          | 66.4   | 9.31    |
| 48                    | 0.882        | 16.01                          | 65.1   | 9.20    |
| 63                    | 0.823        | 15.28                          | 57.8   | 7.27    |
| 85                    | 0.745        | 15.57                          | 55.0   | 6.38    |

**Figure S1.** JV characteristic curves and performance parameters for the ZnO based solar cells with the ZnO interlayers grown at different relative humidity and an annealing temperature of 200 °C.

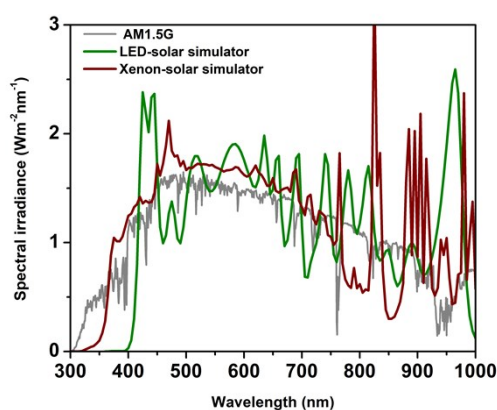

**Figure S2.** Spectra irradiance of the LED (Newport Oriel VeraSol-2™ Class AAA) and the xenon lamp (Newport Oriel Sol3A™) based solar simulators used in this work, compared to the AM1.5G spectrum.

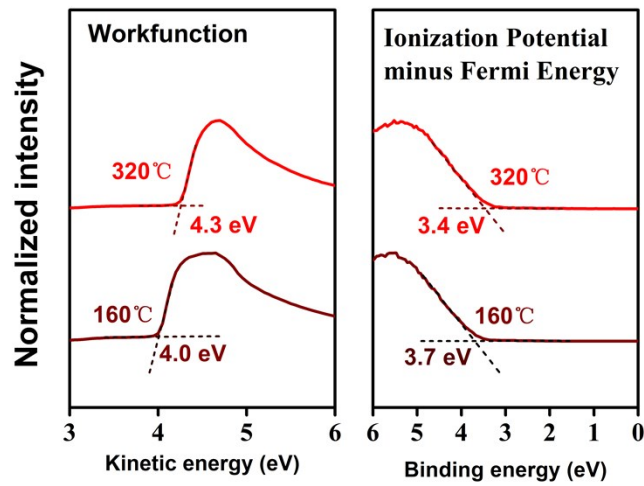

**Figure S3.** UPS spectra for the ZnO interlayers grown at different annealing temperatures.

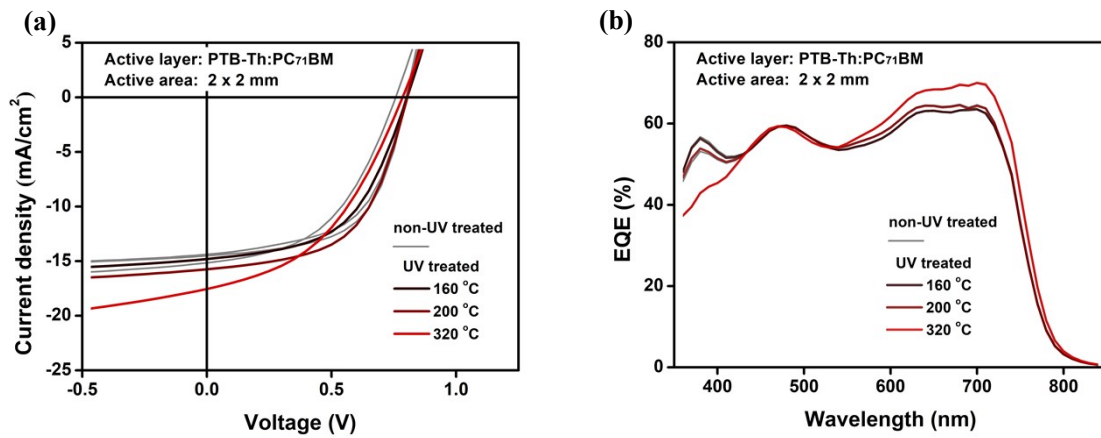

**Figure S4.** a) JV characteristic curves and b) EQE of the solar cells based on PTB7-Th:PC<sub>71</sub>BM with the ZnO interlayers grown at different annealing temperatures, before and after the UV treatment.
